# Supplementary material for: Complete Genome Sequence of Weissella hellenica 0916-4-2 and Its Comparative Genomic Analysis
Source: PubMed Central journal article supplement (PMC6667553; doi:10.3389/fmicb.2019.01619), 2019-07-24
Supplement: Data_Sheet_1.pdf [file Data_Sheet_1.pdf]

**Supplementary information to:**

**Complete genome sequence of *Weissella hellenica* 0916-4-2 and its comparative genomic analysis**

Suresh Panthee<sup>1</sup>, Atmika Paudel<sup>1</sup>, Jochen Blom<sup>2</sup>, Hiroshi Hamamoto<sup>1</sup>, Kazuhisa Sekimizu<sup>1,3,\*</sup>

<sup>1</sup>Teikyo University Institute of Medical Mycology, 359 Otsuka, Hachioji, Tokyo 192-0395, Japan.

<sup>2</sup>Bioinformatics and Systems Biology, Justus-Liebig-University Giessen, 35392 Giessen, Hesse, Germany

<sup>3</sup>Genome Pharmaceuticals Institute, 102 Next Building, 3-24-17 Hongo, Bunkyo-ku, Tokyo 113-0033, Japan

\* Corresponding author: [sekimizu@main.teikyo-u.ac.jp](mailto:sekimizu@main.teikyo-u.ac.jp)

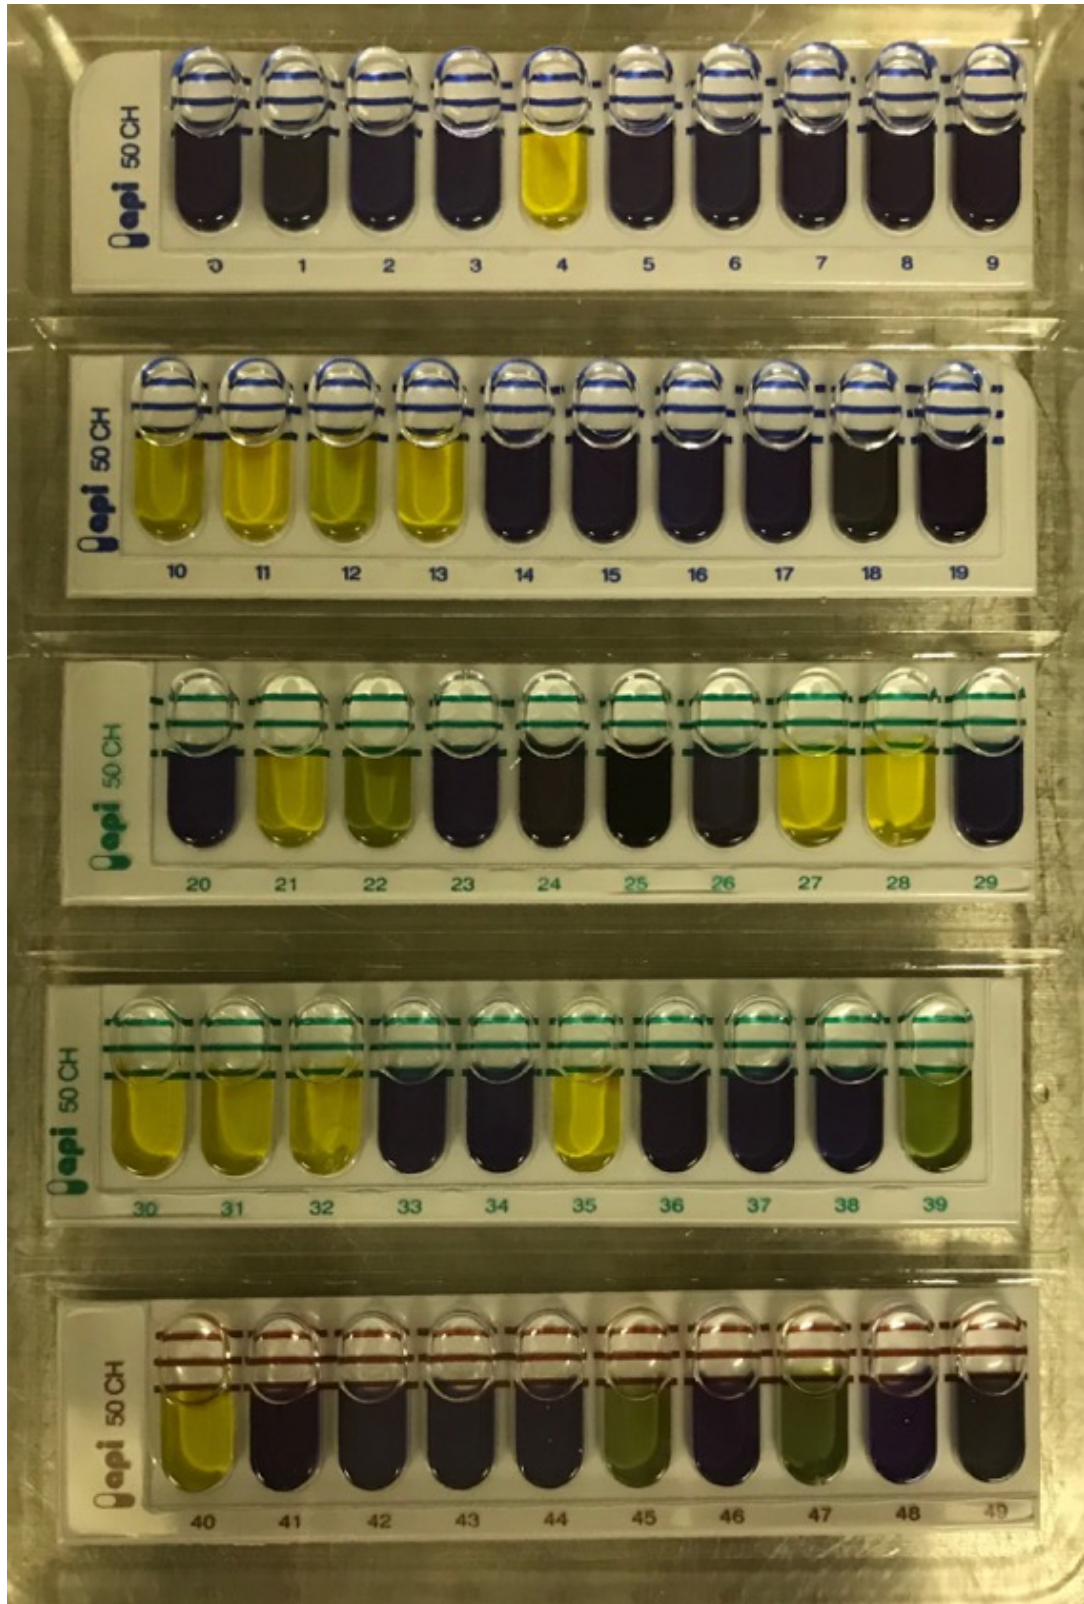

Figure S1. Analysis of carbohydrate metabolism by *W. hellenica* 0916-4-2 using API 50 CH from BioMerieux (Marcy-l'Etoile, France).

**Table S1. Genome assembly and number of phages identified in each genome.** Phages in FBL4 were not analyzed due to the anomalous nature of the assembly.

| SN | Weissella                               | Assembly        |                 | Phage(s) |        |
|----|-----------------------------------------|-----------------|-----------------|----------|--------|
|    |                                         | Accession       | status          | Total    | intact |
| 1  | <i>W. bombi</i> R-53094                 | GCA_900094835.1 | draft           | 1        |        |
| 2  | <i>W. ceti</i> NC36                     | GCA_000320345.1 | draft           | 2        |        |
| 3  | <i>W. ceti</i> WS08                     | GCA_000732905.1 | complete        | 2        |        |
| 4  | <i>W. ceti</i> WS105                    | GCA_000750535.1 | complete        | 2        |        |
| 5  | <i>W. ceti</i> WS74                     | GCA_000750515.1 | complete        | 1        | 1      |
| 6  | <i>W. cibaria</i> AB3b                  | GCA_000878185.1 | draft           | 2        | 2      |
| 7  | <i>W. cibaria</i> AM27-22LB             | GCA_003469985.1 | draft           | 4        | 3      |
| 8  | <i>W. cibaria</i> AM27-24               | GCA_003469955.1 | draft           | 4        | 3      |
| 9  | <i>W. cibaria</i> BM2                   | GCA_003010455.1 | complete        | 3        | 1      |
| 10 | <i>W. cibaria</i> CH2                   | GCA_001308145.2 | complete        | 3        | 2      |
| 11 | <i>W. cibaria</i> CMS1                  | GCA_002243305.1 | complete        | 1        |        |
| 12 | <i>W. cibaria</i> CMS2                  | GCA_001932695.1 | complete        | 1        |        |
| 13 | <i>W. cibaria</i> CMS3                  | GCA_001951095.1 | complete        | 1        |        |
| 14 | <i>W. cibaria</i> CMU                   | GCA_001951075.2 | complete        | 1        |        |
| 15 | <i>W. cibaria</i> DmW103                | GCA_002115575.1 | draft           | 2        | 1      |
| 16 | <i>W. cibaria</i> ff3PR                 | GCA_000878215.1 | draft           | 1        |        |
| 17 | <i>W. cibaria</i> KACC11862             | GCA_000193635.2 | draft           | 2        |        |
| 18 | <i>W. cibaria</i> M2                    | GCA_003076495.1 | complete        | 4        |        |
| 19 | <i>W. cibaria</i> MG1                   | GCA_000878205.1 | draft           | 1        | 3      |
| 20 | <i>W. cibaria</i> OF06-4                | GCA_003439565.1 | draft           | 1        |        |
| 21 | <i>W. cibaria</i> strain 110            | GCA_002614625.1 | draft           | 1        | 1      |
| 22 | <i>W. cibaria</i> strain FBL5           | GCA_001614295.1 | draft           | 3        | 1      |
| 23 | <i>W. cibaria</i> UBA11274              | GCA_003535615.1 | draft           | 1        | 1      |
| 24 | <i>W. cibaria</i> UBA11294              | GCA_003542855.1 | draft           | 4        | 1      |
| 25 | <i>W. confusa</i> 32                    | GCA_003284505.1 | draft           | 3        | 1      |
| 26 | <i>W. confusa</i> AB3E41                | GCA_900166935.1 | draft           | 4        | 1      |
| 27 | <i>W. confusa</i> AF03-13               | GCA_003466065.1 | draft           | 3        |        |
| 28 | <i>W. confusa</i> DSM20196              | GCA_001436895.1 | draft           | 2        | 2      |
| 29 | <i>W. confusa</i> LBAE C39-2            | GCA_000239955.2 | draft           | 4        |        |
| 30 | <i>W. confusa</i> MBF8-1                | GCA_001884305.1 | draft           | 1        |        |
| 31 | <i>W. confusa</i> UBA11342              | GCA_003512765.1 | draft           | 2        |        |
| 32 | <i>W. halotolerans</i> DSM20190         | GCA_001436865.1 | draft           | 3        |        |
| 33 | <i>W. halotolerans</i> FBL4             | GCA_001614305.1 | Draft/anomalous | -        | -      |
| 34 | <i>W. hellenica</i> 0916-4-2            | This paper      | complete        | 3        | 2      |
| 35 | <i>W. hellenica</i> R-53116             | GCA_900095015.1 | draft           | 2        |        |
| 36 | <i>W. hellenica</i> WiKim14             | GCA_000715455.1 | draft           | 3        | 2      |
| 37 | <i>W. jogaejeotgali</i> FOL01           | GCA_001932615.1 | complete        | 6        | 3      |
| 38 | <i>W. kandleri</i> DSM20593             | GCA_001438705.1 | draft           | 2        |        |
| 39 | <i>W. koreensis</i> KACC15510           | GCA_000219805.1 | complete        | 1        |        |
| 40 | <i>W. koreensis</i> KCTC3621            | GCA_000277645.1 | draft           | 4        | 1      |
| 41 | <i>W. koreensis</i> WiKim0080           | GCA_002950695.1 | complete        | 2        | 1      |
| 42 | <i>W. minor</i> DSM20014                | GCA_001437425.1 | draft           | 3        | 2      |
| 43 | <i>W. oryzae</i> SG25                   | GCA_000691805.2 | draft           | 5        | 2      |
| 44 | <i>W. paramesenteroides</i> ATCC33313   | GCA_000160575.1 | draft           | 2        | 1      |
| 45 | <i>W. paramesenteroides</i> FDAARGOS414 | GCA_002386265.1 | complete        | 1        |        |
| 46 | <i>W. soli</i> CECT7031                 | GCA_003353445.1 | draft           | 2        | 1      |
| 47 | <i>W. soli</i> KACC11848                | GCA_001761545.1 | complete        | 2        | 1      |
| 48 | <i>Weissella</i> sp. DD23               | GCA_001579105.1 | draft           | 3        |        |
| 49 | <i>W. thailandensis</i> KCTC3751        | GCA_003363255.1 | draft           | 3        | 2      |
| 50 | <i>W. viridescens</i> DSM20410          | GCA_001437355.1 | draft           | 1        | 1      |
| 51 | <i>W. viridescens</i> MFPC16A2805       | GCA_900216215.1 | chromosome      | 1        |        |
| 52 | <i>W. viridescens</i> NCDO1655          | GCA_001460875.1 | draft           | 2        |        |
| 53 | <i>W. viridescens</i> NCTC13645         | GCA_900460455.1 | draft           | 9        | 1      |

**Table S2 (related to Table 2) Heatmap of the percentage AAI similarity between the conserved regions of the genus *Weissella*.** Species on the first column and first row of the table are represented in the same numeric order. The numbers show the percentage similarity between the conserved regions of the genomes, where the colors vary from yellow (low similarity) to blue (high similarity).

|                           | 1   | 2   | 3   | 4   | 5   | 6   | 7   | 8   | 9   | 10  | 11  | 12  | 13  | 14  | 15  | 16  | 17  | 18  | 19  | 20  | 21  | 22   | 23  | 24  | 25  | 26  | 27  | 28  | 29  | 30  | 31  | 32  | 33  | 34  | 35  | 36  | 37  | 38  | 39  | 40  | 41  | 42  | 43  | 44  | 45  | 46  | 47  | 48  | 49  | 50  | 51  | 52  | 53  |     |     |     |     |     |     |     |     |
|---------------------------|-----|-----|-----|-----|-----|-----|-----|-----|-----|-----|-----|-----|-----|-----|-----|-----|-----|-----|-----|-----|-----|------|-----|-----|-----|-----|-----|-----|-----|-----|-----|-----|-----|-----|-----|-----|-----|-----|-----|-----|-----|-----|-----|-----|-----|-----|-----|-----|-----|-----|-----|-----|-----|-----|-----|-----|-----|-----|-----|-----|-----|
| 1 W. ceti WS74            | 100 | 100 | 100 | 100 | 77  | 77  | 77  | 77  | 77  | 70  | 70  | 70  | 70  | 76  | 76  | 73  | 73  | 73  | 75  | 74  | 74  | 74   | 75  | 75  | 74  | 74  | 77  | 77  | 77  | 77  | 77  | 77  | 77  | 77  | 77  | 77  | 77  | 77  | 77  | 77  | 77  | 77  | 77  | 77  | 77  | 77  | 77  | 77  | 77  | 77  | 77  | 77  | 77  | 77  | 77  |     |     |     |     |     |     |
| 2 W. ceti WS105           | 100 | 100 | 100 | 100 | 77  | 77  | 77  | 77  | 77  | 70  | 70  | 70  | 70  | 76  | 76  | 73  | 73  | 73  | 75  | 74  | 74  | 74   | 75  | 75  | 74  | 74  | 77  | 77  | 77  | 77  | 77  | 77  | 77  | 77  | 77  | 77  | 77  | 77  | 77  | 77  | 77  | 77  | 77  | 77  | 77  | 77  | 77  | 77  | 77  | 77  | 77  | 77  | 77  | 77  | 77  | 77  |     |     |     |     |     |
| 3 W. ceti NC36            | 100 | 100 | 100 | 100 | 77  | 77  | 77  | 77  | 77  | 70  | 70  | 70  | 70  | 76  | 76  | 73  | 73  | 73  | 75  | 74  | 74  | 74   | 75  | 75  | 74  | 74  | 77  | 77  | 77  | 77  | 77  | 77  | 77  | 77  | 77  | 77  | 77  | 77  | 77  | 77  | 77  | 77  | 77  | 77  | 77  | 77  | 77  | 77  | 77  | 77  | 77  | 77  | 77  | 77  | 77  | 77  | 77  |     |     |     |     |
| 4 W. ceti WS08            | 100 | 100 | 100 | 100 | 77  | 77  | 77  | 77  | 77  | 70  | 70  | 70  | 70  | 76  | 76  | 73  | 73  | 73  | 75  | 74  | 74  | 74   | 75  | 75  | 74  | 74  | 77  | 77  | 77  | 77  | 77  | 77  | 77  | 77  | 77  | 77  | 77  | 77  | 77  | 77  | 77  | 77  | 77  | 77  | 77  | 77  | 77  | 77  | 77  | 77  | 77  | 77  | 77  | 77  | 77  | 77  | 77  |     |     |     |     |
| 5 W. minor DSM20014       | 77  | 77  | 77  | 77  | 100 | 88  | 87  | 87  | 87  | 71  | 71  | 71  | 71  | 77  | 76  | 74  | 73  | 73  | 75  | 75  | 75  | 75   | 76  | 76  | 75  | 75  | 77  | 77  | 77  | 77  | 77  | 77  | 77  | 77  | 77  | 77  | 77  | 77  | 77  | 77  | 77  | 77  | 77  | 77  | 77  | 77  | 77  | 77  | 77  | 77  | 77  | 77  | 77  | 77  | 77  | 77  |     |     |     |     |     |
| 6 W. viridescens NCTC13   | 77  | 77  | 77  | 77  | 88  | 100 | 99  | 100 | 99  | 72  | 72  | 72  | 72  | 77  | 77  | 75  | 74  | 74  | 76  | 75  | 76  | 76   | 76  | 76  | 76  | 76  | 78  | 78  | 78  | 78  | 78  | 78  | 78  | 78  | 78  | 78  | 78  | 78  | 78  | 78  | 78  | 78  | 78  | 78  | 78  | 78  | 78  | 78  | 78  | 78  | 78  | 78  | 78  | 78  | 78  | 78  |     |     |     |     |     |
| 7 W. viridescens NCD016   | 77  | 77  | 77  | 77  | 87  | 99  | 100 | 100 | 100 | 71  | 71  | 71  | 71  | 77  | 76  | 74  | 73  | 73  | 76  | 75  | 75  | 75   | 76  | 76  | 75  | 75  | 78  | 78  | 78  | 78  | 78  | 78  | 78  | 78  | 78  | 78  | 78  | 78  | 78  | 78  | 78  | 78  | 78  | 78  | 78  | 78  | 78  | 78  | 78  | 78  | 78  | 78  | 78  | 78  | 78  | 78  | 78  |     |     |     |     |
| 8 W. viridescens DSM204   | 77  | 77  | 77  | 77  | 87  | 100 | 100 | 100 | 100 | 71  | 71  | 71  | 71  | 77  | 77  | 75  | 73  | 73  | 76  | 75  | 75  | 75   | 76  | 76  | 75  | 75  | 78  | 78  | 78  | 78  | 78  | 78  | 78  | 78  | 78  | 78  | 78  | 78  | 78  | 78  | 78  | 78  | 78  | 78  | 78  | 78  | 78  | 78  | 78  | 78  | 78  | 78  | 78  | 78  | 78  | 78  | 78  |     |     |     |     |
| 9 W. viridescens MFPC16   | 77  | 77  | 77  | 77  | 87  | 99  | 100 | 100 | 100 | 71  | 71  | 71  | 71  | 77  | 77  | 74  | 73  | 73  | 76  | 75  | 75  | 75   | 76  | 76  | 75  | 75  | 78  | 78  | 78  | 78  | 78  | 78  | 78  | 78  | 78  | 78  | 78  | 78  | 78  | 78  | 78  | 78  | 78  | 78  | 78  | 78  | 78  | 78  | 78  | 78  | 78  | 78  | 78  | 78  | 78  | 78  | 78  |     |     |     |     |
| 10 W. kandleri DSM20593   | 70  | 70  | 70  | 70  | 71  | 71  | 71  | 71  | 71  | 100 | 82  | 82  | 82  | 71  | 71  | 72  | 75  | 75  | 72  | 72  | 72  | 73   | 73  | 72  | 72  | 74  | 74  | 74  | 74  | 74  | 74  | 74  | 74  | 74  | 74  | 74  | 74  | 74  | 74  | 74  | 74  | 74  | 74  | 74  | 74  | 74  | 74  | 74  | 74  | 74  | 74  | 74  | 74  | 74  | 74  | 74  | 74  |     |     |     |     |
| 11 W. koreensis KACC1551  | 70  | 70  | 70  | 70  | 71  | 72  | 71  | 71  | 71  | 82  | 100 | 100 | 100 | 71  | 71  | 73  | 76  | 76  | 73  | 73  | 73  | 73   | 73  | 72  | 72  | 75  | 75  | 75  | 75  | 75  | 75  | 75  | 75  | 75  | 75  | 75  | 75  | 75  | 75  | 75  | 75  | 75  | 75  | 75  | 75  | 75  | 75  | 75  | 75  | 75  | 75  | 75  | 75  | 75  | 75  | 75  | 75  | 75  |     |     |     |
| 12 W. koreensis KCTC3621  | 70  | 70  | 70  | 70  | 71  | 72  | 71  | 71  | 71  | 82  | 100 | 100 | 100 | 71  | 71  | 73  | 76  | 76  | 73  | 73  | 73  | 73   | 73  | 72  | 72  | 75  | 75  | 75  | 75  | 75  | 75  | 75  | 75  | 75  | 75  | 75  | 75  | 75  | 75  | 75  | 75  | 75  | 75  | 75  | 75  | 75  | 75  | 75  | 75  | 75  | 75  | 75  | 75  | 75  | 75  | 75  | 75  | 75  | 75  |     |     |
| 13 W. koreensis Wikim00   | 70  | 70  | 70  | 70  | 71  | 72  | 71  | 71  | 71  | 82  | 100 | 100 | 100 | 71  | 71  | 73  | 76  | 76  | 73  | 73  | 73  | 73   | 73  | 72  | 72  | 75  | 75  | 75  | 75  | 75  | 75  | 75  | 75  | 75  | 75  | 75  | 75  | 75  | 75  | 75  | 75  | 75  | 75  | 75  | 75  | 75  | 75  | 75  | 75  | 75  | 75  | 75  | 75  | 75  | 75  | 75  | 75  | 75  | 75  |     |     |
| 14 W. halotolerans DSM    | 76  | 76  | 76  | 76  | 77  | 77  | 77  | 77  | 77  | 71  | 71  | 71  | 71  | 100 | 99  | 73  | 73  | 73  | 75  | 75  | 75  | 75   | 75  | 75  | 75  | 75  | 76  | 76  | 76  | 76  | 76  | 76  | 76  | 76  | 76  | 76  | 76  | 76  | 76  | 76  | 76  | 76  | 76  | 76  | 76  | 76  | 76  | 76  | 76  | 76  | 76  | 76  | 76  | 76  | 76  | 76  | 76  | 76  | 76  |     |     |
| 15 W. halotolerans FBL4   | 76  | 76  | 76  | 76  | 76  | 77  | 76  | 77  | 77  | 71  | 71  | 71  | 71  | 99  | 100 | 73  | 73  | 73  | 75  | 74  | 74  | 74   | 75  | 75  | 74  | 75  | 76  | 76  | 76  | 76  | 76  | 76  | 76  | 76  | 76  | 76  | 76  | 76  | 76  | 76  | 76  | 76  | 76  | 76  | 76  | 76  | 76  | 76  | 76  | 76  | 76  | 76  | 76  | 76  | 76  | 76  | 76  | 76  | 76  |     |     |
| 16 W. oryzae SG25         | 73  | 73  | 73  | 73  | 74  | 75  | 74  | 75  | 74  | 72  | 73  | 73  | 73  | 73  | 73  | 100 | 76  | 76  | 77  | 77  | 77  | 77   | 77  | 77  | 77  | 77  | 77  | 77  | 77  | 77  | 77  | 77  | 77  | 77  | 77  | 77  | 77  | 77  | 77  | 77  | 77  | 77  | 77  | 77  | 77  | 77  | 77  | 77  | 77  | 77  | 77  | 77  | 77  | 77  | 77  | 77  | 77  | 77  |     |     |     |
| 17 W. soli CECT7031       | 73  | 73  | 73  | 73  | 74  | 73  | 73  | 73  | 73  | 75  | 75  | 75  | 75  | 76  | 76  | 76  | 76  | 76  | 76  | 76  | 76  | 76   | 76  | 76  | 76  | 76  | 76  | 76  | 76  | 76  | 76  | 76  | 76  | 76  | 76  | 76  | 76  | 76  | 76  | 76  | 76  | 76  | 76  | 76  | 76  | 76  | 76  | 76  | 76  | 76  | 76  | 76  | 76  | 76  | 76  | 76  | 76  |     |     |     |     |
| 18 W. soli KACC11848      | 73  | 73  | 73  | 73  | 74  | 73  | 73  | 73  | 73  | 75  | 75  | 75  | 75  | 73  | 73  | 75  | 100 | 100 | 76  | 76  | 76  | 76   | 76  | 76  | 76  | 76  | 76  | 76  | 76  | 76  | 76  | 76  | 76  | 76  | 76  | 76  | 76  | 76  | 76  | 76  | 76  | 76  | 76  | 76  | 76  | 76  | 76  | 76  | 76  | 76  | 76  | 76  | 76  | 76  | 76  | 76  | 76  | 76  |     |     |     |
| 19 W. bombi R53094        | 75  | 75  | 75  | 75  | 75  | 76  | 76  | 76  | 76  | 72  | 73  | 73  | 73  | 75  | 75  | 77  | 76  | 76  | 100 | 95  | 95  | 95   | 91  | 91  | 91  | 91  | 84  | 84  | 84  | 84  | 84  | 84  | 84  | 84  | 84  | 84  | 84  | 84  | 84  | 84  | 84  | 84  | 84  | 84  | 84  | 84  | 84  | 84  | 84  | 84  | 84  | 84  | 84  | 84  | 84  | 84  | 84  | 84  | 84  |     |     |
| 20 W. hellenica R53116    | 74  | 74  | 74  | 74  | 75  | 76  | 75  | 75  | 75  | 72  | 73  | 73  | 73  | 75  | 74  | 77  | 76  | 76  | 95  | 100 | 98  | 98   | 91  | 91  | 90  | 90  | 84  | 84  | 84  | 84  | 84  | 84  | 84  | 84  | 84  | 84  | 84  | 84  | 84  | 84  | 84  | 84  | 84  | 84  | 84  | 84  | 84  | 84  | 84  | 84  | 84  | 84  | 84  | 84  | 84  | 84  | 84  | 84  | 84  |     |     |
| 21 W. hellenica O916-4-2  | 74  | 74  | 74  | 74  | 75  | 76  | 75  | 75  | 75  | 72  | 73  | 73  | 73  | 75  | 74  | 77  | 76  | 76  | 95  | 98  | 100 | 100  | 91  | 91  | 90  | 90  | 84  | 84  | 84  | 84  | 84  | 84  | 84  | 84  | 84  | 84  | 84  | 84  | 84  | 84  | 84  | 84  | 84  | 84  | 84  | 84  | 84  | 84  | 84  | 84  | 84  | 84  | 84  | 84  | 84  | 84  | 84  | 84  | 84  |     |     |
| 22 W. hellenica Wikim14   | 74  | 74  | 74  | 74  | 75  | 76  | 75  | 75  | 75  | 72  | 73  | 73  | 73  | 75  | 74  | 77  | 76  | 76  | 95  | 98  | 100 | 100  | 91  | 91  | 90  | 90  | 84  | 84  | 84  | 84  | 84  | 84  | 84  | 84  | 84  | 84  | 84  | 84  | 84  | 84  | 84  | 84  | 84  | 84  | 84  | 84  | 84  | 84  | 84  | 84  | 84  | 84  | 84  | 84  | 84  | 84  | 84  | 84  | 84  |     |     |
| 23 W. paramesenteroides   | 75  | 75  | 75  | 75  | 76  | 76  | 76  | 76  | 76  | 73  | 73  | 73  | 73  | 75  | 75  | 77  | 76  | 76  | 91  | 91  | 91  | 91   | 100 | 100 | 95  | 95  | 85  | 85  | 85  | 85  | 85  | 85  | 85  | 85  | 85  | 85  | 85  | 85  | 85  | 85  | 85  | 85  | 85  | 85  | 85  | 85  | 85  | 85  | 85  | 85  | 85  | 85  | 85  | 85  | 85  | 85  | 85  | 85  | 85  |     |     |
| 24 W. paramesenteroides   | 75  | 75  | 75  | 75  | 76  | 76  | 76  | 76  | 76  | 73  | 73  | 73  | 73  | 75  | 75  | 77  | 76  | 76  | 91  | 91  | 91  | 91   | 100 | 100 | 95  | 95  | 85  | 85  | 85  | 85  | 85  | 85  | 85  | 85  | 85  | 85  | 85  | 85  | 85  | 85  | 85  | 85  | 85  | 85  | 85  | 85  | 85  | 85  | 85  | 85  | 85  | 85  | 85  | 85  | 85  | 85  | 85  | 85  | 85  | 85  |     |
| 25 W. jogaejeotgali FOL01 | 74  | 74  | 74  | 74  | 75  | 76  | 75  | 75  | 75  | 72  | 72  | 72  | 72  | 75  | 74  | 77  | 76  | 76  | 91  | 90  | 90  | 90   | 95  | 95  | 100 | 99  | 84  | 84  | 84  | 84  | 84  | 84  | 84  | 84  | 84  | 84  | 84  | 84  | 84  | 84  | 84  | 84  | 84  | 84  | 84  | 84  | 84  | 84  | 84  | 84  | 84  | 84  | 84  | 84  | 84  | 84  | 84  | 84  | 84  |     |     |
| 26 W. thailandensis KCTC  | 74  | 74  | 74  | 74  | 75  | 76  | 75  | 75  | 75  | 72  | 72  | 72  | 72  | 75  | 75  | 77  | 76  | 76  | 91  | 90  | 90  | 90   | 95  | 95  | 99  | 100 | 84  | 84  | 84  | 84  | 84  | 84  | 84  | 84  | 84  | 84  | 84  | 84  | 84  | 84  | 84  | 84  | 84  | 84  | 84  | 84  | 84  | 84  | 84  | 84  | 84  | 84  | 84  | 84  | 84  | 84  | 84  | 84  | 84  |     |     |
| 27 W. cibaria BM2         | 77  | 77  | 77  | 77  | 78  | 78  | 78  | 78  | 78  | 74  | 75  | 75  | 75  | 76  | 76  | 81  | 79  | 79  | 84  | 84  | 84  | 84   | 85  | 85  | 84  | 84  | 100 | 100 | 100 | 100 | 100 | 100 | 100 | 100 | 100 | 100 | 100 | 100 | 100 | 100 | 100 | 100 | 100 | 100 | 100 | 100 | 100 | 100 | 100 | 100 | 100 | 100 | 100 | 100 | 100 | 100 | 100 | 100 | 100 | 100 | 100 |
| 28 W. cibaria KACC11862   | 77  | 77  | 77  | 77  | 78  | 78  | 78  | 78  | 78  | 74  | 75  | 75  | 75  | 76  | 76  | 81  | 79  | 79  | 84  | 84  | 84  | 84</ |     |     |     |     |     |     |     |     |     |     |     |     |     |     |     |     |     |     |     |     |     |     |     |     |     |     |     |     |     |     |     |     |     |     |     |     |     |     |     |
